# Supplementary material
Source: Springer Nature journal article supplement (https://www.springermedizin.de/resource/supplementary/13014_2010_397_MOESM13_ESM.pdf/9633704)

**A**CD133<sup>±</sup> SLGCs  
after isolation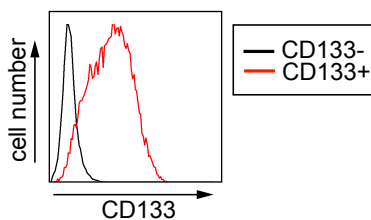CD133  
- +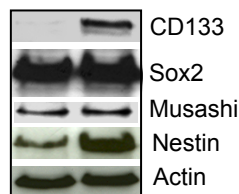CD133<sup>±</sup> SLGCs 7d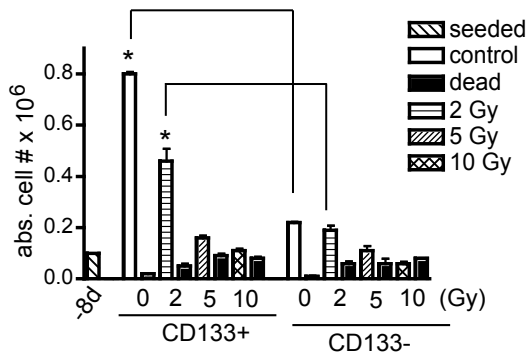CD133<sup>±</sup> SLGCs 7d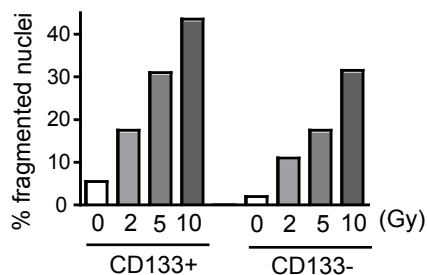**B**

GBM4 SLGCs 7d

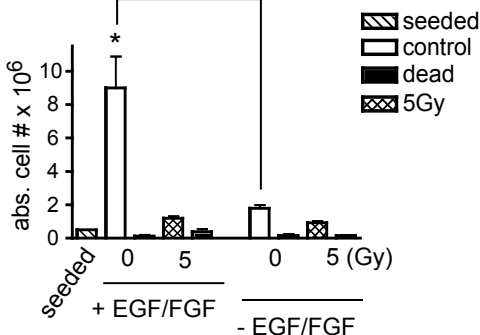

GBM4 SLGCs 7d

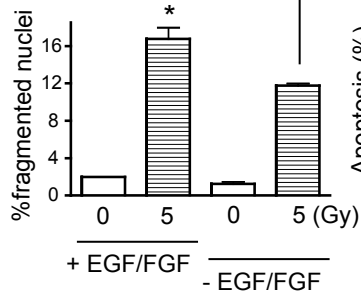

GBM4 SLGCs 7d

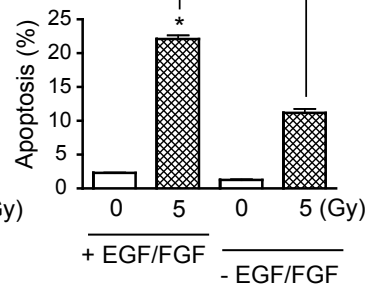

Supplement: MOESM13 [file 9633704]
